# Supplementary material for: Mapping the performance of a versatile water-based condensation particle counter (vWCPC) with COMSOL simulation and experimental study
Source: Copernicus journal article supplement (doi:10.5194/amt-2023-45), 2023-05-04
Supplement: Supplementary file 1 [file amt-2023-45-supplement.pdf]

*Supplement of*

# **Mapping the performance of a versatile water-based condensation particle counter (vWCPC) with COMSOL simulation and experimental study**

Weixing Hao<sup>1</sup>, Fan Mei<sup>2,\*</sup>, Susanne Hering<sup>3</sup>, Steven Spielman<sup>3</sup>, Beat Schmid<sup>2</sup>, Jason Tomlinson<sup>2</sup>, Yang Wang<sup>1,\*</sup>

<sup>1</sup>Department of Chemical, Environmental and Materials Engineering, University of Miami, Miami, FL, 33146, USA

<sup>2</sup>Pacific Northwest National Laboratory, Richland, WA, 99352, USA

<sup>3</sup>Aerosol Dynamics Inc., Berkeley, CA, 94710, USA

*Correspondence to:* Fan Mei ([fan.mei@pnnl.gov](mailto:fan.mei@pnnl.gov)), Yang Wang ([yangwang@miami.edu](mailto:yangwang@miami.edu))

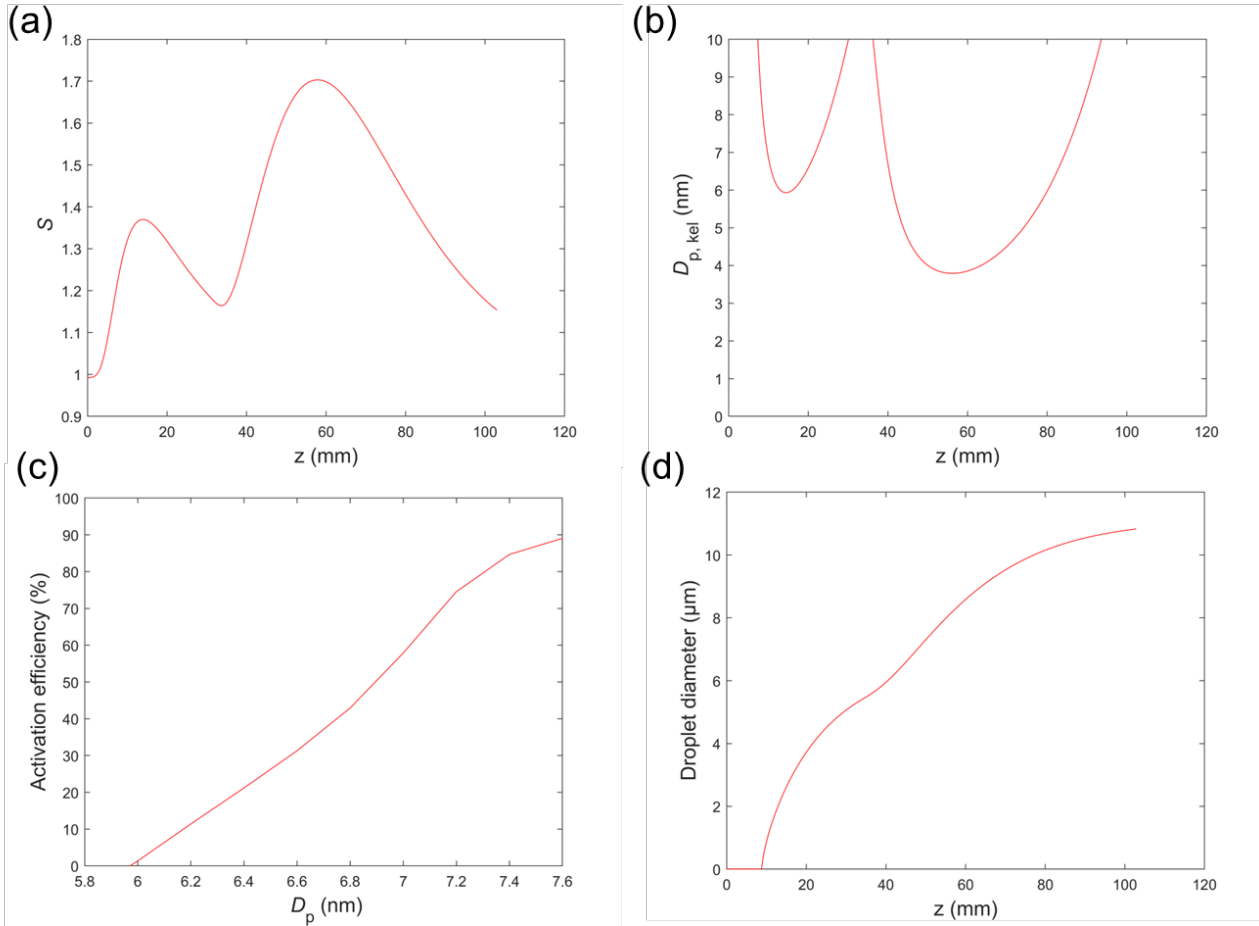

**Fig. S1. Evaluation of particle activation and droplet growth performance at the default temperature condition of  $T_{\text{con}} = 30$  °C,  $T_{\text{ini}} = 59$  °C,  $T_{\text{mod}} = 10$  °C. (a) saturation ratio ( $S$ ), (b) Kelvin equivalent size ( $D_{p, \text{kel}}$ ) as a function of distance along the axis centerline ( $r = 0$ ) of the tube, (c) activation efficiency as a function of particle diameter, and (d) droplet growth size as a function of distance along the axis of the tube. The condensational growth of 8 nm particles was simulated along the centerline ( $r = 0$ ).**

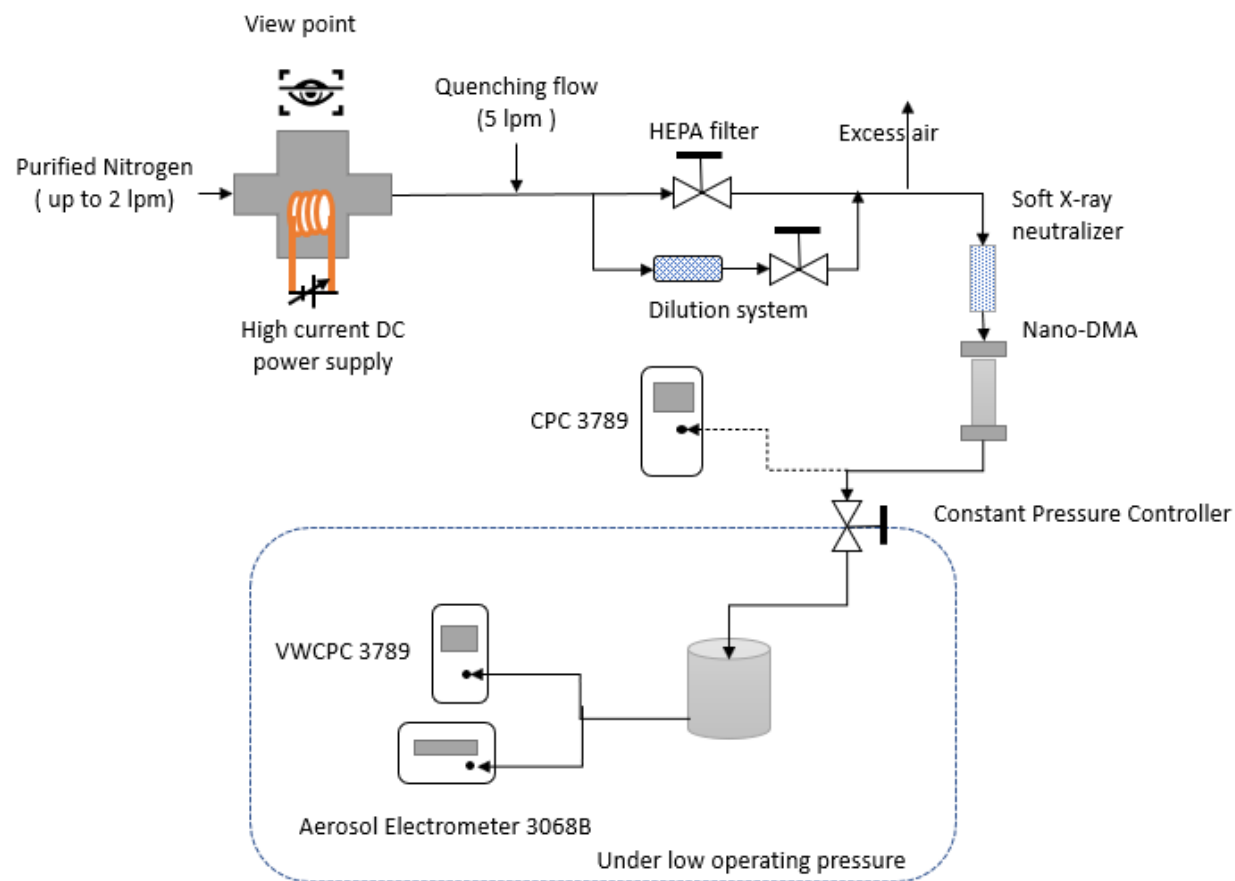

Fig. S2. Schematic diagram of the vWCPC 3789 and flow system under the low-pressure testing.

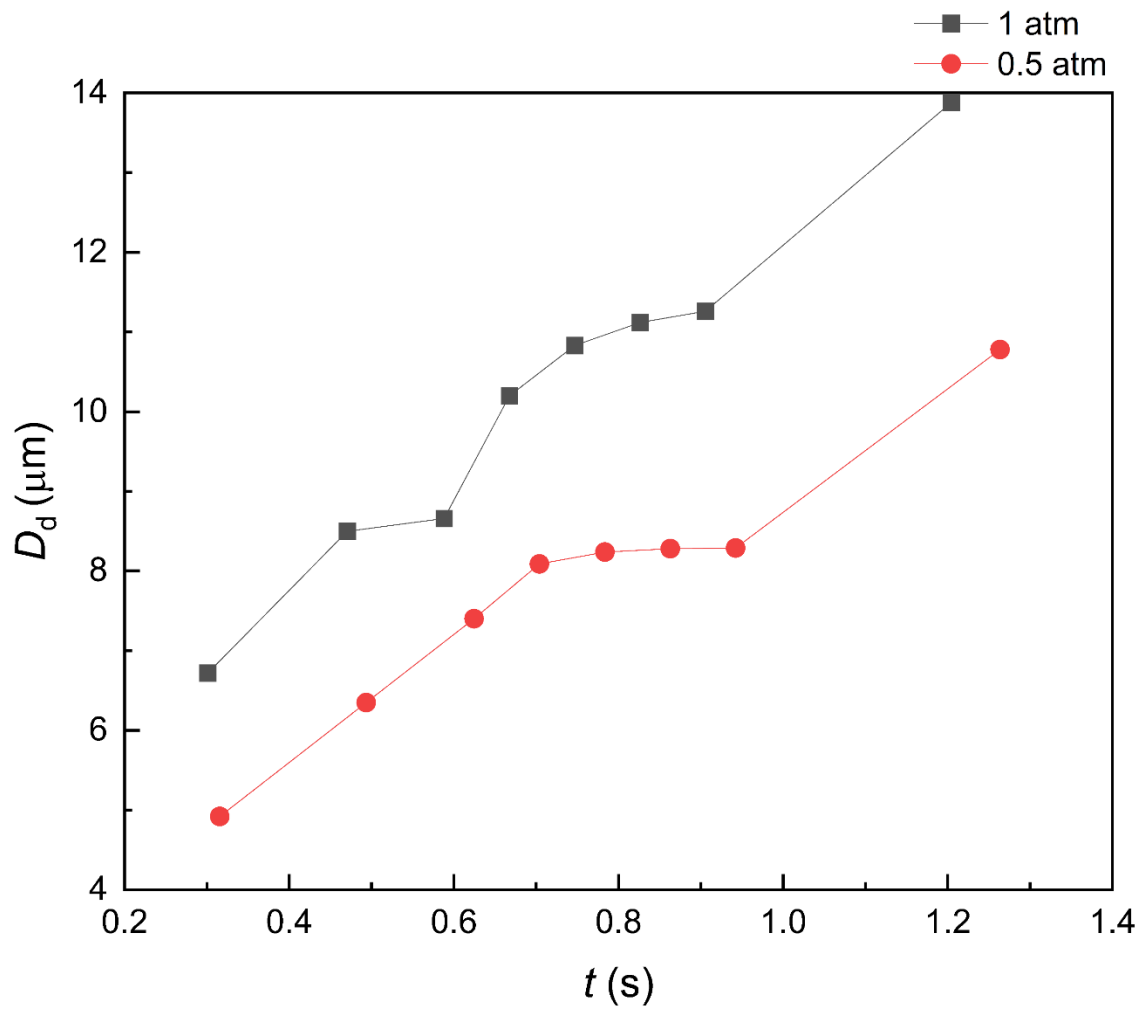

Figure S3. Effect of allowed particle growth time ( $t$ ) at the standard pressure and the reduced pressure of 0.5 atm on final growth particle size at the outlet of moderator along the centerline ( $r = 0$ ),  $D_d$ . The condensational growth of 8 nm particles was tested as seed particles.
